# Supplementary material for: Neural Processing of Speech Sounds in ASD and First-Degree Relatives
Source: Springer Nature journal article supplement (doi:10.1007/s10803-022-05562-7), 2022-06-07
Supplement: MOESM58 [file 23137728]

|                 |                                                                                                                                                                                                                                                                                                                                                                                                                                                                                                                                                                                                                                                     |
|-----------------|-----------------------------------------------------------------------------------------------------------------------------------------------------------------------------------------------------------------------------------------------------------------------------------------------------------------------------------------------------------------------------------------------------------------------------------------------------------------------------------------------------------------------------------------------------------------------------------------------------------------------------------------------------|
| bt_ascii2avg    | <p>this function takes an ascii file and converts contents to</p> <ol style="list-style-type: none"> <li>1) a Neuroscan-format .avg file, and</li> <li>2) a text file containing the marked latencies</li> </ol> <p>Both resulting files will retain the same base filename as the ASCII file with extensions of .avg and .mrk, respectively.</p> <p>Usage: bt_ascii2avg('filename.txt')</p>                                                                                                                                                                                                                                                        |
| bt_biologic2avg | <p>this function takes a Bio-logic ascii file and converts its contents to:</p> <ol style="list-style-type: none"> <li>1) a Neuroscan-format .avg file, and</li> <li>2) a text file containing the marked latencies</li> </ol> <p>Both resulting files will retain the same base filename as the ASCII file with extensions of .avg and .mrk, respectively.</p> <p>Usage: bt_biologic2avg('filename.txt')</p>                                                                                                                                                                                                                                       |
| bt_fft2         | <p>this function computes frequency-domain amplitudes of three user-defined frequency bins of brainstem response. Results are not scaled to peak <math>\mu</math>V.</p> <p>Usage: [F0 F1 HF] =<br/>bt_fft2('filename.avg',10,40,100,150,300,350,600,800);</p> <p>over the range of 10 to 40 ms, finds average frequency amplitude of 100-150 Hz, 300-350 Hz and 600-800 Hz.</p> <p>Three variables are returned the workspace:</p> <ol style="list-style-type: none"> <li>(1) Freq1: mean amplitude over F0_Lo-F0_Hi Hz</li> <li>(2) Freq2: mean amplitude over F1_Lo-F1_Hi Hz</li> <li>(3) Freq3: mean amplitude over HF_Lo to HF_Hi Hz</li> </ol> |
| bt_fftbimap     | <p>this function computes frequency-domain amplitudes of F0, F1 and high-frequency bins of BioMAP response.</p> <p>Usage: [F0 F1 HF] =<br/>bt_fftbimap('filename.avg',start_latency,stop_latency);</p> <p>Note, BioMAP default latencies are 11.38, 40.58.</p> <p>Three variables are returned the workspace:</p> <ol style="list-style-type: none"> <li>(1) F0: mean amplitude over F0_Lo-F0_Hi Hz</li> <li>(2) F1: mean amplitude over F1_Lo-F1_Hi Hz</li> <li>(3) HF: mean amplitude over HF_Lo to HF_Hi Hz</li> </ol>                                                                                                                           |

|           |                                                                                                                                                                                                                                                                                                                                                                                                                                                                                                                                                                                                                                                                                                                                                                                                                                                                                               |
|-----------|-----------------------------------------------------------------------------------------------------------------------------------------------------------------------------------------------------------------------------------------------------------------------------------------------------------------------------------------------------------------------------------------------------------------------------------------------------------------------------------------------------------------------------------------------------------------------------------------------------------------------------------------------------------------------------------------------------------------------------------------------------------------------------------------------------------------------------------------------------------------------------------------------|
| bt_ffts   | <p>this function computes frequency-domain amplitudes of three user-defined frequency bins of Brainstem response. Results are scaled to peak <math>\mu</math>V.</p> <p>Usage: [F0 F1 HF] =<br/>bt_ffts('filename.avg',10,40,100,150,300,350,600,800);</p> <p>over the range of 10 to 40 ms, finds average frequency amplitude of 100-150 Hz, 300-350 Hz and 600-800 Hz.</p> <p>Three variables are returned the workspace:<br/> (1) Freq1: mean amplitude over F0_Lo-F0_Hi Hz<br/> (2) Freq2: mean amplitude over F1_Lo-F1_Hi Hz<br/> (3) Freq3: mean amplitude over HF_Lo to HF_Hi Hz</p>                                                                                                                                                                                                                                                                                                    |
| bt_qncorr | <p>this function compares two files via correlation. Typically this is used to compare a response recorded in background noise with a response to the same stimulus in quiet.</p> <p>Usage: [StraightCorr CrossCorr Lag]=bt_qncorr(Qfile, Nfile, start, stop);</p> <p>Requires 4 input arguments:<br/> Qfile, Nfile: quiet and noise .avg files.<br/> start, stop: latency, in ms., over which the correlations are run</p> <p>3 variables are returned to the workspace:<br/> (1) StraightCorr: Simple Pearson's r over desired latency range<br/> (2) CrossCorr: Maximum correlation, allowing noise response to lag quiet by up to 2 ms.<br/> (3) Lag: Amount of timeshift (in ms.) to achieve CrossCorr</p> <p>In cases where the best correlation occurs with no shift, Lag will be 0 and StraightCorr will equal CrossCorr.</p> <p>Dependancies:<br/> openavg.m<br/> xcorrelation.m</p> |

|                 |                                                                                                                                                                                                                                                                                                                                                                                                                                                                                                                                                                                                                                                                                                                                                                                               |
|-----------------|-----------------------------------------------------------------------------------------------------------------------------------------------------------------------------------------------------------------------------------------------------------------------------------------------------------------------------------------------------------------------------------------------------------------------------------------------------------------------------------------------------------------------------------------------------------------------------------------------------------------------------------------------------------------------------------------------------------------------------------------------------------------------------------------------|
| bt_rms          | <p>this function computes RMS amplitude of response period (selectable), of prestim period, and the resulting SNR.</p> <p>Usage: [RMS RMSprestim SNR] =<br/>bt_rms('filename.avg',start_latency,stop_latency);</p> <p>Note, if start,stop omitted, BioMARK default latencies (11.38, 40.58) are used.</p> <p>Three variables returned to workspace are<br/> RMS: RMS amplitude of selected latency range<br/> RMSprestim: RMS amplitude of prestimulus activity<br/> SNR: The quotient of RMS/RMSprestim</p>                                                                                                                                                                                                                                                                                  |
| bt_srcorr       | <p>Compares brainstem file to the evoking stimulus using cross correlation</p> <p>Usage: [PosCorr PosLag NegCorr NegLag] =<br/>bt_srcorr('file.avg', start, stop);</p> <p>A typical brainstem response, when cross-correlated with the stimulus, exhibits two major correlogram maxima: one positive, one negative. This function returns both and their respective lags.</p> <p>INPUT ARGUMENTS:<br/> 'file.avg': BioMARK data file (in .avg format)<br/> start, stop: latency, in ms., over which the correlation is run</p> <p>OUTPUT ARGUMENTS:<br/> PosCorr, NegCorr: maximum/minimum r-values found at lags corresponding to onset response.</p> <p>PosLag, NegLag: lags corresponding to above.</p> <p>Dependancies:<br/> filtered_stimulus.avg<br/> openavg.m<br/> xcorrelation.m</p> |
| bt_xcorrelation | <p>this function calculates the maximum correlation (maxmincor) value and its respective lag (LAG) over an imputed lag range, for a specified portion of a response. The user must specify whether to find the max positive or max negative correlation value</p>                                                                                                                                                                                                                                                                                                                                                                                                                                                                                                                             |
