# Supplementary material for: Neural Processing of Speech Sounds in ASD and First-Degree Relatives
Source: Springer Nature journal article supplement (doi:10.1007/s10803-022-05562-7), 2022-06-07
Supplement: MOESM67 [file 23137728]

## The Brainstem Toolbox 2013

The Brainstem Toolbox is free software developed and distributed by the Auditory Neuroscience Laboratory at Northwestern University (<http://www.brainvolts.northwestern.edu>)

The brainstem toolbox is distributed in the hope that it will be useful, but WITHOUT ANY WARRANTY; without even the implied warranty of MERCHANTABILITY or FITNESS FOR A PARTICULAR PURPOSE.

You can redistribute it and/or modify it under the terms of the GNU General Public License as published by the Free Software Foundation. See the GNU General Public License for more details <<http://www.gnu.org/licenses/>>.

If you publish or present results derived in part from using this toolbox, we ask that you cite it as follows:

Skoe E, Nicol T & Kraus N (2013). The Brainstem Toolbox. Version 2013  
([www.brainvolts.northwestern.edu](http://www.brainvolts.northwestern.edu))

If the journal does not allow you to cite a web site, then try:

Skoe E, Kraus N. (2010) Auditory brainstem response to complex sounds: a tutorial. *Ear and Hearing* 31(3): 302-324.

## Introduction

The Brainstem Toolbox (bt) includes three graphical user-interface (GUI) modules for performing a number of analyses on evoked responses.

- (1) bt\_gui                   the “main module” for performing time & frequency domain analyses
- (2) bt\_gui\_biomark\_multi (*New in version 2010*)  
designed specifically for users of the BioMARK software  
It is a paired down version of bt\_gui. Multiple files can be processed iteratively.
- (3) bt\_ptgui                the “pitch tracking” (pt) module for assessing how well the frequency-following response follows the periodicity of the evoking stimulus.

This toolbox presents the results of these analyses in a single report for each file. This was designed with speech-evoked brainstem response in mind, so it emphasizes analyses appropriate to periodic signals, but is generalizable to responses evoked by any stimulus.

## Requirements

Matlab is required. The Toolbox was developed in version 7.3 (2006b) on a PC. It has been tested on other 7.X versions. Other versions and platforms have not been verified.

**What is it?**

The Brainstem Toolbox is a collection of MATLAB functions (m-files). Most can be invoked from the command line, but to take fullest advantage of the Toolbox, the GUI should be used. (See help for command-line usage of individual functions.) The m-files that compose the “guts” of the program, reside in the programFiles folder.

**Acknowledgments**

The Toolbox consists of many of our own functions (all those prefixed with “bt\_” and a few others), but also contains several functions and utilities borrowed from other sources. Please see individual m-files for author and copyright information.

**New to MATLAB**

The Mathworks site contains a comprehensive list of MATLAB tutorials.

[http://www.mathworks.com/academia/student\\_center/tutorials/launchpad.html](http://www.mathworks.com/academia/student_center/tutorials/launchpad.html)

**Errors and bugs**

We would like to be informed about any bugs you might encounter. Please email Travis White-Schwoch, [tw@u.northwestern.edu](mailto:tw@u.northwestern.edu).

## Brainstem Toolbox 2013

### Suggested Reading

(available for download: <http://www.soc.northwestern.edu/brainvolts/publications.php>)

Skoe E, Kraus N. (2010) Auditory brainstem response to complex sounds: a tutorial. *Ear and Hearing* 31(3): 302-324.

### Pitch Tracking

Song JH, Skoe E, Wong PCM, Kraus N. (2008) Plasticity in the adult human auditory brainstem following short-term linguistic training. *J Cogn Neurosci*.

Wong PCM, Skoe E, Russo NM, Dees T, Kraus N. (2007) Musical experience shapes human brainstem encoding of linguistic pitch patterns. *Nature Neurosci* 10:420-422.

### How to use it

1. Installation. “Unzip” the distribution file into a new folder.
2. Launch Matlab an/d browse to the folder containing the Toolbox functions. The folder contains the following subfolders and files.

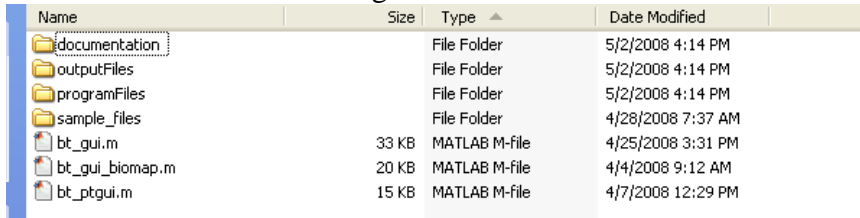

| Name            | Size  | Type          | Date Modified     |
|-----------------|-------|---------------|-------------------|
| documentation   |       | File Folder   | 5/2/2008 4:14 PM  |
| outputFiles     |       | File Folder   | 5/2/2008 4:14 PM  |
| programFiles    |       | File Folder   | 5/2/2008 4:14 PM  |
| sample_files    |       | File Folder   | 4/28/2008 7:37 AM |
| bt_gui.m        | 33 KB | MATLAB M-file | 4/25/2008 3:31 PM |
| bt_gui_biomap.m | 20 KB | MATLAB M-file | 4/4/2008 9:12 AM  |
| bt_ptgui.m      | 15 KB | MATLAB M-file | 4/7/2008 12:29 PM |

#### Description of subfolders:

|               |                                                             |
|---------------|-------------------------------------------------------------|
| documentation | Tutorials and suggested readings                            |
| outputFiles   | All files generated by bt get saved here.                   |
| programFiles  | The “inner guts” of the bt program (m-files and fig files). |
| sample_files  | Sample avg, txt, mrk, xls files                             |

3. At the command prompt, type the name of the module you want to run  
Example: `>> bt_gui`
4. For specifics on how to use each module, refer to the respective user tutorials in the documentation folder.
