# Supplementary material for: Neural Processing of Speech Sounds in ASD and First-Degree Relatives
Source: J Autism Dev Disord. 2022 Jun 7;53(8):3257–71. doi: 10.1007/s10803-022-05562-7 (PMC10019095; doi:10.1007/s10803-022-05562-7)
Supplement: Supplementary file 1 — Supplementary file1 (M 9 kb) [file 10803_2022_5562_MOESM1_ESM.m]

function bioascii2mat(daASCIIfile, clkASCIIfile)
% Convert a biologic ascii file into a mat file.
% This function requires two
% inputs:
% 1.) A D42Q text file
% 2.) A CLKQ text file
%
% example: bioascii2mat('myDaAsciiFile.txt', 'myClkAsciiFile.txt');
%
% The mat file is saved under the subject number with the following
% information:
% 1.) meta
%   a.) subnum - subject id
%   b.) dob - subject's date of birth in numeric format
%   c.) dot - date of biomark data collection
% 2.) da - where the BioMARK short da data are stored
%    a.)meta
%       i.) filename - name of ascii file
%       ii.)xmin - min of epoch, in ms.
%       iii.)xmax - max of epoch, in ms.
%       iv.)Fs - sampling rate, in Hz.
%       v.)pnts -  number of sampling points
%       vi.)numreps - how many reps were collected.
%    b.)chan - First row of data is channel 1, second row of data (if it exists) is chan 2.
%    Channel 2 is only created for 2-chan recordings.
%       i.)latencies - I through O, if not picked, an NaN is inserted.
%       ii.) reps - A, B, Add, and Sub are saved for each rep.
%       iii.) avg - The average of the reps for A, B, Add, and Sub.
% 3.) clk - where the click-evoked data are stored
%    a.)meta
%       i.) filename - name of ascii file
%       ii.)xmin - min of epoch, in ms.
%       iii.)xmax - max of epoch, in ms.
%       iv.)Fs - sampling rate, in Hz.
%       v.)pnts -  number of sampling points
%       vi.)numreps - how many reps were collected.
%    b.)chan - First row of data is channel 1, second row of data (if it exists) is chan 2.
%    Channel 2 is only created for 2-chan recordings.
%       i.)latencies - I, III, and V, if not picked, an NaN is inserted. II
%       and IV have an NaN.
%       ii.) reps - since we collect in rarefaction, only that is saved.
%       iii.) avg - The average of the reps.
%
% JLK and TGN, February 2, 2018


[pathname, subnum]=fileparts(daASCIIfile);
index=strfind(upper(subnum), 'D42');
subnum=subnum(1:index-1);
dafilename = daASCIIfile(1:end-4);
clkfilename = clkASCIIfile(1:end-4);

files={daASCIIfile, clkASCIIfile};

% Load the ascii file
for t=1:length(files)
    if (strfind(upper(files{t}), 'D42'))
        pks={'V', 'A', 'C', 'D', 'E', 'F', 'O', 'I', 'III'};
        xmin=-15.8;
        c1=[0,4];
        c2=[3,7];
    else
        pks={'I', 'II', 'III', 'IV', 'V', 'In', 'Vn', 'SP'};
        pnts=256;
        zeropnt=20;
        xmin=-0.8;
        xmax=9.8184;
        Fs=24015;
        c1=[0,1];
        c2=[0,1];
    end
    
    fid = fopen(files{t});
    numreps = 1;  % index for the number of reps found
    i = 0;  % index for line number, increments before each line is read.
    while(~feof(fid));   % go line by line until the end of the file (feof) is reached.
        i = i+1;   % increment line number
        lyne{i} = fgetl(fid);  % read "line" of text from the ascii file.
        if (strfind(upper(files{t}), 'D42'))
            if i==1;
                dateline=lyne{i}; %Grab the dot and dob. Only need to do this once.
            end
            if (strfind(lyne{i},'Alternating'));  % search for all instances of 'alternating';
                if (strfind(lyne{i-1},'Calculated'));
                    lat_line = i+1; % lats begin one line after 'alternating' on the calculated waveform.
                    if (strfind(lyne{i-1},'1024'));
                        pnts=1024;
                        zeropnt=191;
                        xmax=69.45;
                        Fs=12000;
                    else
                        pnts=512;
                        zeropnt=109;
                        xmax=58.7224;
                        Fs=6857;
                    end
                else
                    rep_start(numreps) = i+6; % data for each rep begins 6 lines after 'alternating'.
                    numreps=numreps+1;
                end
            end
        end
        if (strfind(upper(files{t}), 'CLK'))
            if (strfind(lyne{i},'Rarefaction'));  % search for all instances of 'rarefaction';
                if (strfind(lyne{i-1},'Calculated'));
                    lat_line = i+1; % lats begin one line after 'rarefaction' on the calculated waveform.
                else
                    rep_start(numreps) = i+2; % data for each rep begins 6 lines after 'alternating'.
                    numreps=numreps+1;
                end
            end
        end
    end
    
    numreps=numreps-1; %To account for the additional numreps that was added at the end of the last rep loop.
    
    frewind(fid);  %"rewind" to the beginning of the file,
    
    clear lyne i index
    
    i=0;
    ch=1; %Start by assuming a 1-chan recording.
    
    while(~feof(fid));   % go line by line until the end of the file (feof) is reached.
        i = i+1;   % increment line number
        lyne{i} = fgetl(fid);  % read "line"
        
        if i == rep_start(1);  % determine whether or not the rep_start is on the first line of the rep. This
            % differs for 1- and 2-channel data.
            if strfind(lyne{i}, '"');
                if strfind(upper(files{t}), 'D42')
                    rep_start=rep_start+4; %2-chan da -- reps start 4 lines down from 1-chan da.
                else
                    rep_start=rep_start+2; %2-chan clk - reps start 2 lines down from 1-chan clk.
                end
                ch=2; %If the count is off on where to find the reps, that means it's a 2-chan recording.
            end
        end
        if i == lat_line
            lats=lyne{i};
        end
        
    end
    
    if strfind(upper(files{t}), 'D42') %Grab dob and dot info from da text file.
        textdate=textscan(dateline, '%q');
        textdate=textdate{1}; % This is because textscan saves it as a cell array within a freakin' cell array.
        runasid=textdate{1};
        sex=textdate{5};
        dofb=datenum(textdate{4});
        % Random hoops I needed to jump thru to make losh-lab data work:
        dateformatin = 'mm/dd/yyyy HH:MM:SS';
        doft = datenum(textdate{6}(1:end-3));
    end
    
    textlats=textscan(lats, '%q');
    textlats=textlats{1}; %Again, textscan puts it in a cell inside a cell.
    textlats=textlats(2:end-1); %This is to get rid of the text at the beginning of the string.
    % Could probably make it go to end instead of end-1 but it doesn't
    % really matter unless we add more peaks. The last cell is currently empty.
    numlats=str2double(textlats);
    
    xaxis=linspace(xmin, xmax, pnts);
    
    for p=1:length(pks)
        if ~isnan(numlats(p))
            chan(1).latencies.(pks{p})=closestrc(xaxis, numlats(p));
        else
            chan(1).latencies.(pks{p})=NaN;
        end
    end
    
    if strfind(upper(files{t}), 'D42')
        chan(1).latencies=orderfields(chan(1).latencies, [8,9,1:7]);
    end
    
    if ch==2
        for p = 1:length(pks)
            chan(2).latencies.(pks{p})=NaN;
        end
        if strfind(upper(files{t}), 'D42')
            chan(2).latencies=orderfields(chan(2).latencies, [8,9,1:7]);
        end
    end
    clear lats textlats pks
    %for each channel, pull out the reps.
    for c=1:ch
        for x=1:numreps
            chan(c).rep{x} = dlmread(files{t}, '\t', [rep_start(x)-1 c1(c) (rep_start(x)+pnts-2) c2(c)]);
        end
    end
    clear c x
    % recompute add and sub from the A and B pols in the rep because they have
    % more precision than the add and sub that are exported from biologic.
    if strfind(upper(files{t}), 'D42')
        for c=1:ch
            for x = 1:numreps % do the first four channels.
                chan(c).rep{x}(:,3) = (chan(c).rep{x}(:,1)+chan(c).rep{x}(:,2))./2;
                chan(c).rep{x}(:,4) = (chan(c).rep{x}(:,1)-chan(c).rep{x}(:,2))./2;
            end
        end
    end
    clear x c
    % prestim baseline each rep, doing this for both da and click, even
    % though click has a very short prestim.
    for c=1:ch
        for x=1:numreps
            basemeans=mean(chan(c).rep{x}(1:zeropnt,:));
            basemeans=repmat(basemeans, pnts, 1);
            chan(c).reps{x} = chan(c).rep{x}-basemeans;
        end
    end
    chan=rmfield(chan, 'rep');
    clear x c basemeans
    %Create an average of the reps.
    for c=1:ch
        for f=1:size(chan(1).reps{1}, 2)
            for x=1:numreps
                pol(:,x)=chan(c).reps{x}(:,f);
            end
            chan(c).avg(:,f)=mean(pol,2);
            clear pol
        end
    end
    clear x c f
    
    % Put remaining data into the structure.
    if strfind(upper(files{t}), 'D42')
        da.chan=chan;
        da.meta.file=dafilename;
        da.meta.xmin=xmin;
        da.meta.xmax=xmax;
        da.meta.pnts=pnts;
        da.meta.Fs=Fs;
        da.meta.numreps=numreps;
        da.meta.batched=datestr(now);
        meta.subnum=subnum;
        meta.notes='';
        meta.dob=dofb;
        meta.dot=doft;
        meta.sex=sex;
        meta.runid=runasid;
    elseif strfind(upper(files{t}), 'CLK')
        clk.chan=chan;
        clk.meta.file=clkfilename;
        clk.meta.xmin=xmin;
        clk.meta.xmax=xmax;
        clk.meta.pnts=pnts;
        clk.meta.Fs=Fs;
        clk.meta.numreps=numreps;
        clk.meta.batched=datestr(now);
    end
    fclose(fid);
    clear sex numlats xaxis dofb Fs xmin xmax fid i lat_line lyne rep_start zeropnt x f rep basemeans pnts c1 c2 dateline textdate p numreps chan
end

clear ch clkASCIIfile clkfilename daASCIIfile dafilename t files

save([pathname, '\', subnum, '_', datestr(doft, 29),  '.mat'], 'meta', 'clk', 'da');

clear subnum meta clk da
