# Supplementary material for: Neural Processing of Speech Sounds in ASD and First-Degree Relatives
Source: J Autism Dev Disord. 2022 Jun 7;53(8):3257–71. doi: 10.1007/s10803-022-05562-7 (PMC10019095; doi:10.1007/s10803-022-05562-7)
Supplement: Supplementary file 9 — Supplementary file9 (M 4 kb) [file 10803_2022_5562_MOESM9_ESM.m]

function bt_biologic2avg(ASCIIfile)
% this function takes a Bio-logic ascii file and converts its contents to 
%  1) a Neuroscan-format .avg file, and
%  2) a text file containing the marked latencies
% Both resulting files will retain the same base filename as the ASCII file
%  with extensions of .avg and .mrk, respectively.
% Usage: bt_biologic2avg('filename.txt')

% Dependencies: eeg_load eeg_write ms2row2

BaseFilename = ASCIIfile(1:end-4);

% (1) LOCATE EACH HEADER & DATASET IN ASCII FILE
% Locate "marker report" using the fact 'Chan 1 Bank 1',  appears in column
%         1 of the marker report
% open file
fid = fopen(ASCIIfile);
       
x = 1;  % index for the number of replications sets found
y = 1;  % index for the number of headers found
i = 0;  % index for line number, increments before each line was read.
        % wasn't able to find function that returned line number
        % automatically. 
while(~feof(fid));   % go line by line until the end of the file (feof) is reached.
    i = i+1;   % increment line number
    lyne{i} = fgetl(fid);  % read "line"
    % find marker report
    if (strfind(lyne{i},'Chan 1 Bank 1'));  % search for all instances of 'Chan1 Bank1';
        LatencyLine = i ;                   % returns line number if a match is found
        add_start = i+2;                    % match+2 = beginning of data
    end
    if (strfind(lyne{i},'Calculated'));  % search for all instances of 'Calculated';
        rateLine = i ;                   % returns line number if a match is found
        add_start = i+5;                    % match+5 = what points
    end
end
fclose(fid); % done using textscan, can now close file.

% Extract latencies and save .mrk file
Latencies = lyne(1,LatencyLine);
Latencies = cell2mat(Latencies);
Latencies(Latencies == '"') = [];
Latencies = bt_str2double(Latencies)';
Latencies = Latencies(5:end);
dlmwrite([BaseFilename '.mrk'],Latencies'); % comma delimited

sampleRate=lyne(1,rateLine);
sampleRate = cell2mat(sampleRate);
sampleRate(sampleRate == '"') = [];
sampleRate = bt_str2double(sampleRate)';
sampleRate = sampleRate(7);

clear lyne i x y fid LatencyLine header_start

switch num2str(sampleRate)
    case '512'
        % Save .avg file
        templateFILE = eeg_load('BioMARK-Template.avg'); % load template file
        pnts = templateFILE.header.pnts;  % number of points to extract
        add = dlmread(ASCIIfile, '\t', [add_start-1 0 (add_start+pnts-2) 0]);

        % prestim baseline "ADD file"
        baselined = add - mean(add(ms2row2(templateFILE, ...
            templateFILE.header.xmin*1000):ms2row2(templateFILE, 0)));
        templateFILE.data.samples = baselined;
        %templateFILE.data.samples = add;
        % write baselined data to file.
        eeg_write(templateFILE, [BaseFilename '.avg']);  % generate avg file
    case '1024'
         % Save .avg file
        templateFILE = eeg_load('BioMARK-Template1024.avg'); % load template file
        pnts = templateFILE.header.pnts;  % number of points to extract
        add = dlmread(ASCIIfile, '\t', [add_start-1 0 (add_start+pnts-2) 0]);

        % prestim baseline "ADD file"
        baselined = add - mean(add(ms2row2(templateFILE, ...
            templateFILE.header.xmin*1000):ms2row2(templateFILE, 0)));
        templateFILE.data.samples = baselined;
        %templateFILE.data.samples = add;
        % write baselined data to file.
        eeg_write(templateFILE, [BaseFilename '.avg']);  % generate avg file
    case '64'
         % Save .avg file
        templateFILE = eeg_load('SixtyFourTemplate.avg'); % load template file
        pnts = templateFILE.header.pnts;  % number of points to extract
        add = dlmread(ASCIIfile, '\t', [add_start-1 0 (add_start+pnts-2) 0]);

        % prestim baseline "ADD file"
        baselined = add - mean(add(ms2row2(templateFILE, ...
            templateFILE.header.xmin*1000):ms2row2(templateFILE, 0)));
        templateFILE.data.samples = baselined;
        %templateFILE.data.samples = add;
        % write baselined data to file.
        eeg_write(templateFILE, [BaseFilename '.avg']);  % generate avg file
end
