# Supplementary material for: Neural Processing of Speech Sounds in ASD and First-Degree Relatives
Source: J Autism Dev Disord. 2022 Jun 7;53(8):3257–71. doi: 10.1007/s10803-022-05562-7 (PMC10019095; doi:10.1007/s10803-022-05562-7)
Supplement: Supplementary file 20 — Supplementary file20 (M 3 kb) [file 10803_2022_5562_MOESM20_ESM.m]

function [Picked Auto] = bt_peaks2(AvgFile,MarkerFile)
% same as bt_peaks, but avg and marker filenames are not required to be the same.

% Dependancies: openavg, ms2row, closestrc

% read in data file
y = openavg(AvgFile);
Baseline = mean(y.signal(ms2row(y,y.xmin):ms2row(y,0)));

% There will be two sets of latency/amplitude/VAcomplex values returned.
% 1) As picked (in .mrk file)  Variable prefix: Picked
% 2) Auto-picked, using .mrk file as seed. Variable prefix: Auto

%%%% AS PICKED %%%%
% read in latency file
PickedLats = dlmread(MarkerFile)';
PickedAmps = y.signal(ms2row(y,PickedLats));

% Execute only if there any marks to read; allows for null
if sum(sum(PickedLats))
    % V/A calcs: assumes V and A are first 2 peaks
    Picked_VA_interpeak_lat = PickedLats(2)-PickedLats(1);
    Picked_VA_interpeak_amp = PickedAmps(1)-PickedAmps(2);
    Picked_VA_slope = -Picked_VA_interpeak_amp./Picked_VA_interpeak_lat;
    Picked_VA_area = y.signal-PickedAmps(2); % waveform shifted to "A" = 0 uV
    Picked_VA_area = sum(Picked_VA_area(ms2row(y,PickedLats(1)):...
        ms2row(y,PickedLats(2)))); % sum points btw V and A
    Picked_VA_area = Picked_VA_area*((y.xmax-y.xmin)/y.pnts); % convert 
        % from µV*pt to µV*ms

    %%%% AUTOPICKED %%%%
    NumPeaks = length(PickedLats);
    AutoLats = zeros(NumPeaks,1); % preallocate for loop below
    AutoAmps = zeros(NumPeaks,1); % preallocate for loop below
    Step = 1000/y.rate;

    % For wave V (lat(1)), find max amplitude -0/+2 points from picked
    points = y.signal(ms2row(y,PickedLats(1)):ms2row(y,PickedLats(1))+2);
    AutoAmps(1) = max(points);
    adjustment = (find(points==AutoAmps(1)));
    % sometimes, more than one point has same amp; choose closest to picked
    if length(adjustment)>1
        [junk row junk] = closestrc(adjustment,1); % find nearest to picked
        adjustment = adjustment(row);
    end
    adjustment = (adjustment-1).*Step;
    AutoLats(1) = PickedLats(1)+adjustment;

    % For all other peaks, find min amplitude -2/+2 points from picked
    for x=2:NumPeaks
        points = y.signal(ms2row(y,PickedLats(x))-2:ms2row(y,PickedLats(x))+2);
        AutoAmps(x) = min(points);
        adjustment = (find(points==AutoAmps(x)));
        % sometimes, more than one point has same amp; choose closest to picked
        if length(adjustment)>1
            [junk row junk] = closestrc(adjustment,3); % find nearest to picked
            adjustment = adjustment(row);
        end
        adjustment = (adjustment-3).*Step;
        AutoLats(x) = PickedLats(x)+adjustment;
    end

    % V/A calcs: assumes V and A are first 2 peaks
    Auto_VA_interpeak_lat = AutoLats(2)-AutoLats(1);
    Auto_VA_interpeak_amp = AutoAmps(1)-AutoAmps(2);
    Auto_VA_slope = -Auto_VA_interpeak_amp./Auto_VA_interpeak_lat;
    Auto_VA_area = y.signal-AutoAmps(2); % waveform shifted to "A" = 0 uV
    Auto_VA_area = sum(Auto_VA_area(ms2row(y,AutoLats(1)):...
        ms2row(y,AutoLats(2)))); % sum points btw V and A
    Auto_VA_area = Auto_VA_area*((y.xmax-y.xmin)/y.pnts); % convert 
        % from µV*pt to µV*ms

    % Consolodate into two cell arrays, correcting amps to prestim baseline
    Auto{1} = AutoLats;
    Auto{2} = AutoAmps-Baseline;
    Auto{3} (1,1) = Auto_VA_interpeak_lat;
    Auto{3} (2,1) = Auto_VA_interpeak_amp;
    Auto{3} (3,1) = Auto_VA_slope;
    Auto{3} (4,1) = Auto_VA_area;

    Picked{1} = PickedLats;
    Picked{2} = PickedAmps-Baseline;
    Picked{3} (1,1) = Picked_VA_interpeak_lat;
    Picked{3} (2,1) = Picked_VA_interpeak_amp;
    Picked{3} (3,1) = Picked_VA_slope;
    Picked{3} (4,1) = Picked_VA_area;
else
    Picked = cell(0);
    Auto = cell(0);
end
