# Supplementary material for: Neural Processing of Speech Sounds in ASD and First-Degree Relatives
Source: J Autism Dev Disord. 2022 Jun 7;53(8):3257–71. doi: 10.1007/s10803-022-05562-7 (PMC10019095; doi:10.1007/s10803-022-05562-7)
Supplement: Supplementary file 28 — Supplementary file28 (M 9 kb) [file 10803_2022_5562_MOESM28_ESM.m]

function [num,status] = str2double(s,cdelim,rdelim)
%% STR2DOUBLE converts strings into numeric values
%%  [NUM, STATUS] = STR2DOUBLE(STR) 
%%  
%%    STR can be the form '[+-]d[.]dd[[eE][+-]ddd]' 
%%	d can be any of digit from 0 to 9, [] indicate optional elements
%%    NUM is the corresponding numeric value. 
%%       if the conversion fails, status is -1 and NUM is NaN.  
%%    STATUS = 0: conversion was successful
%%    STATUS = -1: couldnot convert string into numeric value
%%
%%    Elements which are not defined or not valid return NaN and 
%%        the STATUS becomes -1 
%%    STR can be also a character array or a cell array of strings.   
%%        Then, NUM and STATUS return matrices of appropriate size. 
%%
%%    STR can also contain multiple elements.
%%    default row-delimiters are: 
%%        NEWLINE, CARRIAGE RETURN and SEMICOLON i.e. ASCII 10, 13 and 59. 
%%    default column-delimiters are: 
%%        TAB, SPACE and COMMA i.e. ASCII 9, 32, and 44.
%%
%%  [NUM, STATUS] = STR2DOUBLE(STR,CDELIM,RDELIM) 
%%       CDELIM .. user-specified column delimiter
%%       RDELIM .. user-specified row delimiter
%%       CDELIM and RDELIM must contain only 
%%       NULL, NEWLINE, CARRIAGE RETURN, SEMICOLON, TAB, SPACE, COMMA, or ()[]{}  
%%       i.e. ASCII 0,9,10,11,12,13,14,32,33,34,40,41,44,59,91,93,123,124,125 
%%
%%    Examples: 
%%	str2double('-.1e-5')
%%	   ans = -1.0000e-006
%%
%% 	str2double('.314e1, 44.44e-1, .7; -1e+1')
%%	ans =
%%	    3.1400    4.4440    0.7000
%%	  -10.0000       NaN       NaN
%%
%%	line ='200,300,400,NaN,-inf,cd,yes,no,999,maybe,NaN';
%%	[x,status]=str2double(line)
%%	x =
%%	   200   300   400   NaN  -Inf   NaN   NaN   NaN   999   NaN   NaN
%%	status =
%%	    0     0     0     0     0    -1    -1    -1     0    -1     0

%% References: 
%% [1] David A. Wheeler, Secure Programming for Linux and Unix HOWTO.
%%    http://en.tldp.org/HOWTO/Secure-Programs-HOWTO/

%% This program is free software; you can redistribute it and/or
%% modify it under the terms of the GNU General Public License
%% as published by the Free Software Foundation; either version 2
%% of the License, or (at your option) any later version.
%% 
%% This program is distributed in the hope that it will be useful,
%% but WITHOUT ANY WARRANTY; without even the implied warranty of
%% MERCHANTABILITY or FITNESS FOR A PARTICULAR PURPOSE.  See the
%% GNU General Public License for more details.
%% 
%% You should have received a copy of the GNU General Public License
%% along with this program; if not, write to the Free Software
%% Foundation, Inc., 59 Temple Place - Suite 330, Boston, MA  02111-1307, USA.

%%	$Revision: 1.7 $
%%	$Id: str2double.m,v 1.7 2004/03/06 22:48:48 schloegl Exp $
%%	Copyright (C) 2004 by Alois Schloegl <a.schloegl@ieee.org>	


% valid_char = '0123456789eE+-.nNaAiIfF';	% digits, sign, exponent,NaN,Inf
valid_delim = char(sort([0,9:14,32:34,abs('()[]{},;"|')]));	% valid delimiter
if nargin < 1,
        error('missing input argument.')
end;
if nargin < 2,
        cdelim = char([9,32,abs(',')]);		% column delimiter
else
        % make unique cdelim
        cdelim = sort(cdelim(:)');
        tmp = [1,1+find(diff(cdelim)>0)];
        cdelim = cdelim(tmp);
end;
if nargin < 3,
        rdelim = char([0,10,13,abs(';')]);	% row delimiter
else
        % make unique rdelim
        rdelim = sort(rdelim(:)');
        tmp = [1,1+find(diff(rdelim)>0)];
        rdelim = rdelim(tmp);
end;

% check if RDELIM and CDELIM are distinct
delim = sort(abs([cdelim,rdelim]));
tmp   = [1, 1 + find(diff(delim)>0)];
delim = delim(tmp);
%[length(delim),length(cdelim),length(rdelim)]
if length(delim) < (length(cdelim)+length(rdelim)),
        error('row and column delimiter are not distinct.');
end;

% check if delimiters are valid
tmp  = sort(abs([cdelim,rdelim]));
flag = zeros(size(tmp));
k1 = 1;
k2 = 1;
while (k1 <= length(tmp)) & (k2 <= length(valid_delim)),
        if tmp(k1) == valid_delim(k2),            
                flag(k1) = 1; 
                k1 = k1 + 1;
        elseif tmp(k1) < valid_delim(k2),            
                k1 = k1 + 1;
        elseif tmp(k1) > valid_delim(k2),            
                k2 = k2 + 1;
        end;
end;
if ~all(flag),
        error('Invalid delimiters!');
end;

%%%%% various input parameters 
if iscell(s),
        strarray = s;

elseif ischar(s) & all(size(s)>1),	%% char array transformed into a string. 
	for k = 1:size(s,1), 
                tmp = find(~isspace(s(k,:)));
                strarray{k,1} = s(k,min(tmp):max(tmp));
        end;

elseif ischar(s),
        num = [];
        status = 0;
        strarray = {};
        
        k1 = 1; % current row
        k2 = 0; % current column
        k3 = 0; % current element
        
        sl = length(s);
        ix = 1;
        while any(s(ix)==[rdelim,cdelim]) & (ix < sl),
                ix = ix + 1;
        end;
        ta = ix; te = [];
        while ix <= sl;
                if (ix == sl),
                        te = sl;
                end;
                if any(s(ix)==[cdelim,rdelim]),
                        te = ix - 1;
                end;
                if ~isempty(te),
                        k2 = k2 + 1;
                        k3 = k3 + 1;
                        strarray{k1,k2} = s(ta:te);
                        %strarray{k1,k2} = [ta,te];
                        
                        flag = 0;
                        while any(s(ix)==[cdelim,rdelim]) & (ix < sl),
                                flag = flag | any(s(ix)==rdelim);
                                ix = ix + 1;
                        end;
                        
                        if flag, 
                                k2 = 0;
                                k1 = k1 + 1;
                        end;
                        ta = ix;
                        te = [];
	        end;
                ix = ix + 1;
        end;
else
        error('invalid input argument');
end;

[nr,nc]= size(strarray);
status = zeros(nr,nc);
num    = repmat(NaN,nr,nc);

for k1 = 1:nr,
for k2 = 1:nc,
        t = strarray{k1,k2};
        epos = find((t=='e') | (t=='E'));	%% positon of E 
        if (length(t)==0), 			%% if more than one E is found 
		status(k1,k2) = -1;		%% return error code
                num(k1,k2) = NaN;
        elseif (length(epos)>1), 			%% if more than one E is found 
		status(k1,k2) = -1;		%% return error code
                num(k1,k2) = NaN;
        else				
                if length(epos)==0, 		%% no E found 
                        e = 0;
                        epos = length(t)+1;	
                elseif (length(epos)==1), 	%% one E found
                        l = epos+1;
                        if ~any(t(length(t))=='0123456789'); %last character must be a digit
                                e = nan;
                                status(k1,k2) = -1;
                        else
                                % get exponent
                                v = 0;
                                g = 1;
                                if t(l)=='-',
                                        g = -1; l = l+1;
                                elseif t(l)=='+',
                                        l = l+1;
                                end;
                                while l <= length(t),
                                        if any(t(l)=='0123456789');
                                                v = v*10 + t(l) - '0';        
                                        else
                                                v = nan;        
		                                status(k1,k2) = -1;
                                        end;
                                        l = l+1;
                                end;
                                e = g*v;
                        end;
                end;
                
                %% get mantisse
                g = 0;
                v = 1;
                if t(1)=='-',
                        v = -1; 
                        l = min(2,length(t));
                elseif t(1)=='+',
                        l = min(2,length(t));
                else
                        l = 1;
                end;

                if strcmpi(t(l:epos-1),'inf')
                        v = v*inf;
                        
                elseif strcmpi(t,'NaN');
                        v = NaN;
                        
                elseif all(sum(t(1:epos-1)=='.')<[2,epos-1]), 	% at most one dot, and at least one digit is needed 
                        p = 0;
                        while l < epos,
                                if any(t(l)=='0123456789');
                                        g = g*10 + t(l) - '0';        
                                elseif t(l)=='.',
                                        p = epos - 1 - l;
                                else
                                        v = nan;        
					status(k1,k2) = -1;
                                end;
                                l = l+1;        
                        end;
                        v = g*v*10^(e-p);
                else
			status(k1,k2) = -1;
                        v = NaN;
                end;
                num(k1,k2) = v;
	end;
end;
end;        
