# Supplementary material for: Neural Processing of Speech Sounds in ASD and First-Degree Relatives
Source: J Autism Dev Disord. 2022 Jun 7;53(8):3257–71. doi: 10.1007/s10803-022-05562-7 (PMC10019095; doi:10.1007/s10803-022-05562-7)
Supplement: Supplementary file 33 — Supplementary file33 (M 0 kb) [file 10803_2022_5562_MOESM33_ESM.m]

delete(gcf)
clear global answerSR answerRR chan chanN chanStim 
