# Supplementary material for: Neural Processing of Speech Sounds in ASD and First-Degree Relatives
Source: J Autism Dev Disord. 2022 Jun 7;53(8):3257–71. doi: 10.1007/s10803-022-05562-7 (PMC10019095; doi:10.1007/s10803-022-05562-7)
Supplement: Supplementary file 34 — Supplementary file34 (M 0 kb) [file 10803_2022_5562_MOESM34_ESM.m]

function [closestv, r, c]=closestrc(M, value)
[closestva, closesti]=min(abs(M(:) - value));
[r,c]=ind2sub(size(M), closesti);
closestv = M(closesti);
