# Supplementary material for: Neural Processing of Speech Sounds in ASD and First-Degree Relatives
Source: J Autism Dev Disord. 2022 Jun 7;53(8):3257–71. doi: 10.1007/s10803-022-05562-7 (PMC10019095; doi:10.1007/s10803-022-05562-7)
Supplement: Supplementary file 41 — Supplementary file41 (M 0 kb) [file 10803_2022_5562_MOESM41_ESM.m]

function zprime = fisher(r)
% performs Fisher's transform
% Use this function to perform hypothesis testing on the correlation coefficient.
% Usage:  fisher(r)
zprime = log((1+r)./(1-r))./2;
