# Supplementary material for: Neural Processing of Speech Sounds in ASD and First-Degree Relatives
Source: J Autism Dev Disord. 2022 Jun 7;53(8):3257–71. doi: 10.1007/s10803-022-05562-7 (PMC10019095; doi:10.1007/s10803-022-05562-7)
Supplement: Supplementary file 42 — Supplementary file42 (M 0 kb) [file 10803_2022_5562_MOESM42_ESM.m]

function r = fisherinv(zprime)
% Description: performs inverse Fisher's transform
% Use this function to convert a z' score
%   to a correlation coefficient.
% Usage:  fisherinv(zprime)
r = (exp(zprime./0.5)-1)./(exp(zprime./0.5)+1);
