# Supplementary material for: Neural Processing of Speech Sounds in ASD and First-Degree Relatives
Source: J Autism Dev Disord. 2022 Jun 7;53(8):3257–71. doi: 10.1007/s10803-022-05562-7 (PMC10019095; doi:10.1007/s10803-022-05562-7)
Supplement: Supplementary file 45 — Supplementary file45 (M 0 kb) [file 10803_2022_5562_MOESM45_ESM.m]

function index = localmax(x)
index = find( diff( sign( diff([0; x(:); 0]) ) ) < 0 );
