# Supplementary material for: Neural Processing of Speech Sounds in ASD and First-Degree Relatives
Source: J Autism Dev Disord. 2022 Jun 7;53(8):3257–71. doi: 10.1007/s10803-022-05562-7 (PMC10019095; doi:10.1007/s10803-022-05562-7)
Supplement: Supplementary file 48 — Supplementary file48 (M 0 kb) [file 10803_2022_5562_MOESM48_ESM.m]

function RowNum = ms2row2(AvgStruct,Ms)
% calculates row number of a given latency for a Neuroscan .avg file.
% example, assuming AVG is a structure array resulting from a eeg_load
% command,
%
% rownumber = ms2row2(AVG,23.5)
Ms = Ms/1000;

PtsPerMs = (AvgStruct.header.pnts-1)/(AvgStruct.header.xmax-AvgStruct.header.xmin);
Offset = PtsPerMs.*AvgStruct.header.xmin-1;
RowNum=round(Ms.*PtsPerMs-Offset);
