# Supplementary material for: Neural Processing of Speech Sounds in ASD and First-Degree Relatives
Source: J Autism Dev Disord. 2022 Jun 7;53(8):3257–71. doi: 10.1007/s10803-022-05562-7 (PMC10019095; doi:10.1007/s10803-022-05562-7)
Supplement: Supplementary file 52 — Supplementary file52 (M 3 kb) [file 10803_2022_5562_MOESM52_ESM.m]

function [time autocorr LAG FFT freqAxis preFFT blocks]= pitchtrack(avgname, block, step, startAnalysis,channel,exportData)

if block<40
    display('Block Size is too small. Using default: 40 ms');
    block = 40;
end

%Open average file
[file]= openavg(avgname);
%Define time axis
timeaxis = linspace(file.xmin, file.xmax, file.pnts)';

% extract signal
SIGNAL = file.signal(:,channel);
% get sampling rate
fs = file.rate;


% ---------------------------PRESTIM, ---------------------------
% extract portion of prestimulus time, and detrend. The size of the prestim portion is dependent on the block size.
% To do SNR calculations block and prestim must be same the same number of ms.
% If the block size is 40ms, then only 40ms of the prestim will be
% extracted.

PRESTIM = SIGNAL(1: ms2row(file, block));   %start with the very first point.
% ramp
r = hann(size(PRESTIM, 1));  % the entire prestim is ramped.
% ramp and detrend
PRESTIM = detrend(PRESTIM.*hann(size(PRESTIM,1)), 'constant');
% FFT (zero-padded to sampling rate);
preFFT = abs(fft(PRESTIM, fs));
%scale preFFT
preFFT= preFFT*(2./length(PRESTIM));
preFFT=preFFT(1:1001,1);  %truncate above 1000 Hz


%  ------------------ FFTS of RESPONSE CHUNKS-----------------------
j = startAnalysis; % each time through loop j increases by step size;

chunks = 5000;    % an arbitrary maximum number of blocks that the program will create.

for k = 1:chunks;   %the program knows to stop once file.xmax is exceeded
    
    % variables created:
    ramptime = (block/1000);   % ramp the entire chunk
    start = j;
    stop = j+block;
    
    if stop>(file.xmax)  % if stop exceeds the maximum ms time then abort and break out from loop
        k=k-1;
        j=j-step;
        break;
    else
        signal = detrend(SIGNAL(ms2row(file, start):ms2row(file, stop)), 'constant');   % de-mean to zero
    end
    
    midpoint(k) = mean(ms2row(file, start):ms2row(file,stop));  %calculates the time corresponding to the midpoint of the chunk
    midpoint(k)
    % generate ramp
    ramp = hann(size(signal,1));
    % ramp and de-mean
    signal = detrend(signal.*ramp, 'constant');
    
    
    % autocorrelation (see Boersma 1993)
    [c lag]=xcorr(signal, 'coeff');
    
    
    [cwin lagwin]=xcorr(ramp, 'coeff');
    LAG = linspace(-block, block, length(c));
    
    autoc=c./cwin;
    autoc(autoc>1)=1;  %this handles the very rare case that the remainder of the previous step is >1.
    % only plot the first 15 ms; % lowest frequency is ~66 Hz.
    
    
    
    startlag = find(LAG==0);
    endlag = find(LAG==closestrc(LAG, 15));
    
    
    % truncate lag and r value matrices to only include values up to first 15 ms.
    autocorr(:,k)=autoc(startlag:endlag)';
    LAG = LAG(startlag:endlag)';
    
    ostartlag = startlag;
    
    ostoplag = endlag;
    
    %%% Now do FFTs;
    % fft, pads to sampling rate
    fftsignal{k} = abs(fft(signal, fs));
    % only go up to 1000 Hz;
    FFT{k} = fftsignal{k}(1:1001,1);
    FFT{k}= FFT{k}*(2./length(signal));
    freqAxis = linspace(0, 1000, 1001);
    
    j = j+step;  % loop through next time chunk
    
    
    
end
time = timeaxis(round(midpoint));

blocks = k;

FFT = cell2mat(FFT);


if exportData == 1
    [fpath fname ext]=fileparts(avgname);
    FFTfile = [fpath, '\', fname, '-FFTmatrix.xls'];
    ACfile = [fpath, '\', fname, '-ACmatrix.xls'];
    
    xlswrite(FFT, fname, {'FFT matrix'}, FFTfile, 'Sheet1');
    xlswrite(freqAxis', fname, {'Frequency Axis'}, FFTfile, 'Sheet2');
    xlswrite(time, fname, {'Time Axis'}, FFTfile,     'Sheet3');
    
    xlswrite(autocorr, fname, {'autocorrelation matrix'}, ACfile, 'Sheet1');
    xlswrite( LAG, fname, {'Lag Axis'} , ACfile, 'Sheet2');
    xlswrite(time, fname, {'Time Axis'} , ACfile, 'Sheet3');
    
    
end
