# Supplementary material for: Neural Processing of Speech Sounds in ASD and First-Degree Relatives
Source: J Autism Dev Disord. 2022 Jun 7;53(8):3257–71. doi: 10.1007/s10803-022-05562-7 (PMC10019095; doi:10.1007/s10803-022-05562-7)
Supplement: Supplementary file 68 — Supplementary file68 (XLSX 8 kb) [file 10803_2022_5562_MOESM68_ESM.xlsx]

## Sheet: Sheet1
0
Response: 0000.00_YaRising_rep1.avg
Stimulus: ya_up3202.avg
Number of time chunks: 191
Pitch Error	Pitch Strength	Correlation	# below Noise Floor	# Not Spectral Max
5.46073	0.47133	0.950385	2	21
