# Supplementary material for: Neural Processing of Speech Sounds in ASD and First-Degree Relatives
Source: J Autism Dev Disord. 2022 Jun 7;53(8):3257–71. doi: 10.1007/s10803-022-05562-7 (PMC10019095; doi:10.1007/s10803-022-05562-7)
Supplement: Supplementary file 72 — Supplementary file72 (M 2 kb) [file 10803_2022_5562_MOESM72_ESM.m]

function convertavg(Filename);

TimeZero = 161; % hardcoded point number of 0 ms.
%% Data file reading and identification of elements
fid = fopen(Filename);
% pull out the data, keeping track of the line number of the "real"
% waveform
x = 1;  % index for the number of replication records found
y = 1;  % index for the number of calculated records found
i = 0;  % index for line number, increments before each line was read.
         
while(~feof(fid));   % go line by line until the end of the file (feof) is reached.
    i = i+1;   % increment line number
    lyne{i} = fgetl(fid);  % read "line"
    % Determine if first line of a replication
    if strfind(lyne{i},'AEP');
        Rep(x) = i;
        x = x + 1;
    elseif strfind(lyne{i},'Calculated')
        Calced(y) = i;
        y = y + 1;
    end
end
fclose(fid);
clear fid i x y

% error check and adjust to true line number
if numel(Calced) ~= 1
    disp('Average not found; that`s ok, looking for reps');
end

% Irregularity checking and reporting.
if ~exist('Rep')
    error('No reps found. Aborting');
end
if numel(Rep)==1;
    display('Only 1 rep found; will process this one rep and stop')
elseif numel(Rep)>2;
    display([num2str(numel(Rep)) ' reps found; averaging them all']);
end

%% Begin assembly of data structure
avg.pnts = 1024;
avg.rate = 3202;
avg.xmin = -50;
avg.xmax = 319.8-50;
avg.chan_names = ['A         ';'B         ';...
    'Add       ';'Sub       '];
avg.nsweeps = 1;
avg.signal = [];
avg.variance = zeros(1024,4);

% assemble, baseline, etc., andsave the reps
Rep = Rep+7; % how many lines after identified header the data begins
% Grab the data as text
for x = 1:numel(Rep)
    bob{x} = lyne(Rep(x):Rep(x)+1023).';
end
% Convert data to numbers
for x = 1:numel(Rep)
    for y = 1:1024
        data{x}(y,:) = str2num(bob{x}{y});
    end
end
clear x y bob

% Prestim baseline (only A and B), then re-create add and sub, because
%   a slight amount of precision is lost in the 3rd & 4th columns 
%   of the exported text files.
for x = 1:numel(Rep)
    premean=mean(data{x}(1:TimeZero,1));
    data{x}(:,1) = data{x}(:,1) - premean;
    premean=mean(data{x}(1:TimeZero,2));
    data{x}(:,2) = data{x}(:,2) - premean;
    data{x}(:,3) = (data{x}(:,1) + data{x}(:,2))./2;
    data{x}(:,4) = (data{x}(:,1) - data{x}(:,2))./2;
end

% Now, march thru the reps (can be any number) and save avgs.
for x = 1:numel(Rep)
    avg.signal = data{x};
    outfile = [Filename(1:end-4) '_rep' num2str(x) '.avg'];
    writeavg(avg,outfile);
end
clear TimeZero lyne outfile premean x Calced    
%% Compute and save final average
% (i.e., not relying on exported calculated grand average after all. Not
% least because it is only the added channel.
if numel(Rep) > 1
    datamtx = cell2mat(data);
    datamtx = reshape(datamtx,1024,4,numel(Rep));
    avg.signal = mean(datamtx,3);
    outfile = [Filename(1:end-4) '.avg'];
    writeavg(avg,outfile);
end
