# Supplementary material for: Neural Processing of Speech Sounds in ASD and First-Degree Relatives
Source: J Autism Dev Disord. 2022 Jun 7;53(8):3257–71. doi: 10.1007/s10803-022-05562-7 (PMC10019095; doi:10.1007/s10803-022-05562-7)
Supplement: Supplementary file 74 — Supplementary file74 (M 7 kb) [file 10803_2022_5562_MOESM74_ESM.m]

% Write a help

% get files and finesse if just one
[filenames,pathname] = uigetfile('*.mat','Choose Biomark mat-files','multiselect', 'on');
if ~iscell(filenames), temp = filenames; clear filenames; filenames{1} = temp; end

% Set some initial time and freq ranges
start=19.5; % applies to da; click range defined later.
stop=44.2; % applies to da; click range defined later.
freqstarts=[75, 175, 750];
freqstops=[175, 750, 1050];
chan=1; % Do all analyses on vertical channel. Change to 2 for horizontal
Outfile = ['Biomark_' date '.xlsx'];
if exist(['Biomark_' date '.xlsx'], 'file')
    mydir=dir(['Biomark_' date, '*.xlsx']);
    Outfile=['Biomark_' date, '_', num2str(length(mydir)), '.xlsx'];
end
for f=1:length(filenames)
    %% Get metadata
    load([pathname filenames{f}])
    subnum{f,1}=meta.subnum;
    dob(f,1) = meta.dob;
    dot(f,1) = meta.dot;
    testage(f,1)=(meta.dot-meta.dob)/365.25;
    subsex{f,1}=meta.sex;
    DaReps(f,1) = da.meta.numreps;
    %% Get latency information.
    clkpeaks(f,:)=struct2cell(clk.chan(chan).latencies);
    dapeaks(f,:)=struct2cell(da.chan(chan).latencies);
    vlat=dapeaks{f,3};
    alat=dapeaks{f,4};
    vamploc=ms2row(da, vlat);
    vamp=da.chan(chan).avg(vamploc,3);
    aamploc=ms2row(da, alat);
    aamp=da.chan(chan).avg(aamploc,3);
    xaxis=linspace(da.meta.xmin, da.meta.xmax, da.meta.pnts);
    %% Get V/A-complex measures
    v2a=da.chan(chan).avg(vamploc:aamploc,3); %Amplitudes from peak V to peak V
    vadur(f)=alat-vlat;
    vaamp(f)=vamp-aamp;
    vaslope(f)=-vaamp(f)/vadur(f);
    valegacyarea(f)=polyarea([vlat; xaxis(vamploc:aamploc)'], [aamp; v2a]);
    if da.meta.pnts==512;
        vaarea(f)=1.75*sum((v2a-min(v2a)));
    else
        vaarea(f)=sum((v2a-min(v2a)));
    end
    %% Get frequency information.
    % fftdata: vector of all frequencies at all polarities (A, B, Add, Sub) butwe're only taking away the average of 
    % F0, F1, and HF as defined in Cereb Cortex over the Cereb Cort time region for Add and Sub
   
    [fftdata, xfft]=bmarkfft(da, start, stop, chan); %pulling all polarities.
   
    for b=1:length(freqstarts)
        [~,startval]=closestrc(xfft, freqstarts(b));
        [~,stopval]=closestrc(xfft, freqstops(b));
        indavgfreqsadd(b,:)=nanmean(fftdata(startval:stopval,3));
        indavgfreqssub(b,:)=nanmean(fftdata(startval:stopval,4));
    end
    avgfreqs(f,:)=[indavgfreqsadd', indavgfreqssub'];
    %% Get RMS measures
    avgdata=da.chan(chan).avg;
    prestimrms(f,:)=std(avgdata(1:ms2row(da,0),:),1,1);
    postroirms(f,:)=std(avgdata(ms2row(da,start):ms2row(da,stop),:),1,1);
    snr(f,:)=postroirms(f,:)./prestimrms(f,:);
    %% Get Stim2resp correlation
    %This will calc stim2resp on all channels, i.e., vertical and horizontal.
    [maxcorr, maxcorz, maxcorrlag] = xcorrbmark(da, start, stop);
    %We are only pulling the first channel (i.e., vertical) data.
    maxr(f)=maxcorr(chan);
    maxz(f)=maxcorz(chan);
    maxlag(f)=maxcorrlag(chan);
    %% Response Consistency
    % Instead of hard-coding A:B, B:C, A:C (i.e., in the case of 3 reps),
    % setting up a general looping algorithm for both click and da to future-
    % proof if there is a desire to do an "all sweeps available" variant. The code below is 
    % easily adaptible to do dozens of sweeps if desired. See the comment following the "if" within the 
    % loops below for guidance on how to remove the cap of three. First clk, then da
    clkstart = 0; % ms, for RC; clkstop is end of epoch, per history
    rcount = 1;
    if length(clk.chan(chan).reps)>1
        for first = 1:length(clk.chan(chan).reps)-1
            for second = 2:length(clk.chan(chan).reps)
                if second > first && first < 3 && second < 4 % remove 2nd & 3rd conditionals if all available sweeps are desired
                    clkRs(rcount,1) = nancorrcoef(clk.chan(chan).reps{first}(ms2row(clk,clkstart):end),...
                        clk.chan(chan).reps{second}(ms2row(clk,clkstart):end));
                    rcount = rcount + 1;
                end
            end
        end
        clkRC_Z(f,1) = mean(fisher(clkRs));
        clkRC_R(f,1) = fisherinv(clkRC_Z(f,1));
    else
        clkRC_Z(f,1) = NaN; clkRC_R(f,1) = NaN;
    end
    rcount = 1;
    if length(da.chan(chan).reps)>1
        for first = 1:DaReps(f,1)-1
            for second = 2:DaReps(f,1)
                if second > first && first < 3 && second < 4 % remove 2nd & 3rd conditionals if all available sweeps are desired
                    daRs(rcount,1) = nancorrcoef(da.chan(chan).reps{first}(ms2row(da,start):ms2row(da,stop),3),...
                        da.chan(chan).reps{second}(ms2row(da,start):ms2row(da,stop),3));
                    daRs(rcount,2) = nancorrcoef(da.chan(chan).reps{first}(ms2row(da,start):ms2row(da,stop),4),...
                        da.chan(chan).reps{second}(ms2row(da,start):ms2row(da,stop),4));
                    rcount = rcount + 1;
                end
            end
        end
        dameanZs = mean(fisher(daRs),1); % 2 columns = add, sub
        daRC_Zadd(f,1) = dameanZs(1);
        daRC_Zsub(f,1) = dameanZs(2);
        daRC_Radd(f,1) = fisherinv(daRC_Zadd(f,1));
        daRC_Rsub(f,1) = fisherinv(daRC_Zsub(f,1));
    else
        daRC_Zadd(f,1) = NaN; daRC_Radd(f,1) = NaN; daRC_Zsub(f,1) = NaN; daRC_Rsub(f,1) = NaN;
    end
    clear rcount first second clkstart clkstop dameanZs clkRs daRs    
end
% Create headers and assemble all data in piecemeal,corresponding to logical breaks (above) 
% Metadata
headers={'Sub ID', 'Sex', 'DOB', 'DOT', 'Test Age', 'DaReps'};
textdata=[subnum, subsex];
numdata=[dob, dot, testage, DaReps];
% Latencies
clklabels=fieldnames(clk.chan(chan).latencies);
for c=1:length(clklabels)
    clklabels{c}=['Clk_', clklabels{c}];
end
dalabels=fieldnames(da.chan(chan).latencies);
headers=[headers, clklabels', dalabels'];
% V/A composites
vaheaders={'VA_dur', 'VA_amp', 'VA_slope', 'VA_area', 'VA_leg_area'};
headers=[headers, vaheaders];
numdata=[numdata, cell2mat(clkpeaks), cell2mat(dapeaks), vadur', vaamp', vaslope', vaarea', valegacyarea'];
% Freq-domain measures
freqlabels={'F0', 'F1', 'HF'};
for l=1:length(freqlabels)
    subhead{l}=[freqlabels{l}, '_sub'];
end
headers=[headers, freqlabels, subhead];
numdata=[numdata,avgfreqs];
% RMS measures
rmsheaders={'RMSpre', 'RMSsubpre', ['RMS_', num2str(start), '-', num2str(stop)],['RMSsub_', num2str(start), '-', num2str(stop)], ['SNR_', num2str(start), '-', num2str(stop)], ['SNRsub_', num2str(start), '-', num2str(stop)]};
headers=[headers,rmsheaders];
numdata=[numdata, prestimrms(:,3:4), postroirms(:,3:4), snr(:,3:4)];
% Stimulus-to-response
corrheaders={['S2Rr_', num2str(start), '-', num2str(stop)], ['S2Rz_', num2str(start), '-', num2str(stop)], ['S2Rlag_', num2str(start), '-', num2str(stop)]};
headers=[headers,corrheaders];
numdata=[numdata,maxr', maxz', maxlag'];
% Response consistency
RCheaders={'clkRC_Z', ['daRC_Zadd' , num2str(start), '-', num2str(stop)], ['daRC_Zsub', num2str(start), '-', num2str(stop)], 'clkRC_R', ['daRC_Radd', num2str(start), '-', num2str(stop)], ['daRC_Rsub',num2str(start), '-', num2str(stop)]};
headers=[headers,RCheaders];
numdata=[numdata, clkRC_Z, daRC_Zadd, daRC_Zsub, clkRC_R, daRC_Radd, daRC_Rsub];
clear clkRC_Z daRC_Zadd daRC_Zsub clkRC_R daRC_Radd daRC_Rsub clkpeaks dapeaks vadur vaamp
clear clk da meta DaReps avgdata rmsheaders maxcorr maxcorz maxcorrlag corrheaders snr maxr maxz maxlag RCheaders
clear indavgfreqsadd indavgfreqssub fftdata b l subhead vamploc aamploc vaheaders c avgfreqs prestimrms postroirms
clear aamp vamp alat vlat v2a f start stop chan freqstarts freqstops freqlabels vaslope vaarea valegacyarea
clear startval stopval xaxis xfft vloc filenames allmats dob dot subnum testage subsex clklabels dalabels

xlswrite2(Outfile,headers,'Sheet1','A1');
xlswrite2(Outfile,textdata,'Sheet1','A2');
xlswrite2(Outfile,numdata,'Sheet1','C2');
display([Outfile ' created']);clear
