# Supplementary material for: Neural Processing of Speech Sounds in ASD and First-Degree Relatives
Source: J Autism Dev Disord. 2022 Jun 7;53(8):3257–71. doi: 10.1007/s10803-022-05562-7 (PMC10019095; doi:10.1007/s10803-022-05562-7)
Supplement: Supplementary file 75 — Supplementary file75 (M 14 kb) [file 10803_2022_5562_MOESM75_ESM.m]

function markmatfile1_1(filename, chan)
% Peak review and picking for Bio-logic click and da data.
% Works on 2018-style combined mat-files.
% Presents first the click, then the da waveform for peak picking.
% Then, updates mat-files with adjusted latencies if any changes are made.
% Requires "datatip.m"
% ------
% Usage:
% markmatfile('filename.mat',chan), where chan is a number
% markmatfile('filename.mat'), defaults to channel 1
% markmatfile [sans arguments] brings up browse window. In this case, it 
%  defaults to operating on channel 1. If you wish to use the no-argument 
%  browsing mode with a channel other than 1, you will need to alter the 
%  nargin lines near the beginning of the function.
% ------
% Notes:
% 1) All possible peaks are pre-loaded onto waveform. If a peak is not
%   already desiginated in the mat-file, it appears near the beginning of the
%   waveform (i.e., in the prestim period). Therefore...
%   a) If you want to assign a previously unassigned peak, you must "find" it
%     in the prestim and move it to the appropriate location. You may have to
%     dig for it if there are multiple un-labeled peaks.
%   b) If you want to take a peak away (i.e., demote an already-picked peak
%     to NR), you must drag it into the prestim period. 
% 2) Never add or remove any peaks. If you wish to 'delete' a peak, drag it
%   into the prestim period. This will earn it NaN status. If you add a 
%   new peak (e.g, via alt-click) there is no mechanism for naming the
%   peak and saving it to the mat-file.
% 3) After clicking "Finish" button on the Da waveform, it will be
%   determined whether any peak(s) changed (either click or da). If so, the 
%   mat-file is updated with the newly-chosen peak(s) and today's date is 
%   entered into the appropriate stim.meta.revised field(s).
% 4) Clicking the "Abort" button fully 86es updating of the mat-file. It is 
%   NOT a per-stimulus action. So if, for example, you make some click
%   changes, proceed to da, and decide da does not need updating, clicking 
%   "Abort" will NOT register the click changes in the mat-file. Only  
%   clicking "Finish" initiates the mat-file update procedure.
%
% Version 1.1 Trent Nicol, 20-Mar-2018, and beyond.
% Updates since v 1.0:
% Arranged buttons, abort on btm-left, continue/finish on btm-right
% Red/green color-coding for buttons
% Plot reps
% Plot shaded boxes for expected lats (da only).
% Line at 0 ms

%% main function
% Set some global variables that are shared btw main and sub fxns.
global Bundle clkplot  

if nargin < 2 % defaults to channel 1
    chan = 1;
end
if nargin < 1 % Browse dialog opened AND defaults to channel 1
    [Browsedfile, Pathname] = uigetfile('*.mat', 'Pick a mat-file');
    filename = [Pathname Browsedfile];
end

% Open desired file, assembles relevant data into global fxn "Bundle"
load(filename);
% Extract da
Bundle.xda = linspace(da.meta.xmin,da.meta.xmax,da.meta.pnts).';
Bundle.dawave = da.chan(chan).avg(:,3);
% Extract click
Bundle.xclk = linspace(clk.meta.xmin,clk.meta.xmax,clk.meta.pnts).';
Bundle.clkwave = clk.chan(chan).avg;
% Extract additional goodies
Bundle.clkmin = clk.meta.xmin;
Bundle.clkmax = clk.meta.xmax;
Bundle.damin = da.meta.xmin;
Bundle.damax = da.meta.xmax;
Bundle.clklatencies = clk.chan(chan).latencies;
Bundle.dalatencies = da.chan(chan).latencies;
Bundle.filename = filename;
Bundle.chan = chan;
Bundle.clklabels = fieldnames(clk.chan(chan).latencies);
Bundle.dalabels = fieldnames(da.chan(chan).latencies);
Bundle.dareps = da.chan(chan).reps;
Bundle.age = (meta.dot-meta.dob)/365.25; % seems to be 100% hit rate for dob

% plot click
clkplot = plot(Bundle.xclk,Bundle.clkwave,'b','linewidth',2);
maximize
xlim([Bundle.clkmin Bundle.clkmax])
[~,basefile] = fileparts(filename);
title([basefile, ' click'], 'interpreter', 'none');

% Apply existing click markers
% create 'str' variable that defines what appears in datatips
for x= 1:size(Bundle.clklabels,1)
    str{x} = {[Bundle.clklabels{x} ': '], 'Amp: '};
end
nulloc = 1; % "Null" location. Where to place unmarked peak.
for p = 1:size(Bundle.clklabels,1)
    currentlat = Bundle.clklatencies.(Bundle.clklabels{p});
    [~,currentpoint] = closestrc(Bundle.xclk,currentlat);
    if currentpoint ~= 1; % a 1 indicates NaN
        datatip(clkplot, currentpoint, str{p}, 'hold');
    else
        datatip(clkplot, nulloc, str{p}, 'hold'); % if NaN, stick label in prestim
        nulloc = nulloc + 2; % bump any subsequent NaN out a bit.
    end
end

% add replications
hold on
for x = 1:size(clk.chan(chan).reps,2)
    plot(Bundle.xclk,clk.chan(chan).reps{x},'color',[.7 .7 .7],'linewidth',.5);
end

% Add zero line
yaxes = get(gca,'ylim');
plot([0 0],yaxes,':k')

% Put plot in "ready to pick peaks" mode.
DataCursorObj = datacursormode(gcf);
set(DataCursorObj,'Enable','on')

% User now tweaks, adds, or deletes markers to the click waveform, and
% chooses to either "Continue to da" or "Abort."

% "Continue to da" button (calls 'movetoda' subfunction)
uicontrol(gcf,'style', 'pushbutton',...
    'string', 'Continue to da',...
    'units', 'normalized',...
    'Position', [0.85 0.1 0.1 0.1],... % lower right
    'BackgroundColor', [.35 .4 .3],... % greenish
    'FontSize', 12,...
    'FontWeight', 'bold',...
    'ForegroundColor', [1 1 1],... % font color (white)
    'callback',@movetoda); 

% "Abort" button (calls 'abort' subfunction)
uicontrol(gcf,'style', 'pushbutton',...
    'string', 'XX Abort XX',...
    'units','normalized',...
    'Position', [0.05 0.1 0.1 0.1],... % lower left
    'BackgroundColor', [.8 0 0],... % red
    'FontSize', 12,...
    'FontWeight', 'bold',...
    'ForegroundColor', [1 1 1],... % font color (white)
    'callback', @abort); 

end % of main function

%% On pushing 'Continue to da' button...
function movetoda(~,~)
% Grabs the seleted click latencies and proceeds to da

global NewLats Bundle daplot

% Gobble up the (new/changed) click latencies, put them in cell 1 of NewLats
DataCursorClk = datacursormode(gcf);
set(DataCursorClk,'Enable','on')
NewLats{1} = getCursorInfo(DataCursorClk);

%close click figure and get ready to plot the da
close(gcf);

% Determine norms for each peak by age.
% Tables of norms for all da peaks 
% "Cerebral Cortex" norms for V, A, D, E, F, O; 
% III and C are from Kriz et al. '10; No age distinction.
% I is mean of all extant (3/21/18), but with constrained SD so it wouldn't
%   overlap III; No age distinction.
% "peaks in rows, ages in columns
latency_means_table = [2.85,4.78,7.22,8.22,18.65,23.14,31.51,39.91,49.64;...
    2.85,4.78,6.59,7.56,18.65,22.36,30.90,39.34,48.14;...
    2.85,4.78,6.45,7.39,18.65,22.16,30.82,39.23,47.88;...
    2.85,4.78,6.45,7.37,18.65,22.27,30.79,39.34,48.10;...
    2.85,4.78,6.56,7.53,18.65,22.45,30.82,39.40,48.08;...
    2.85,4.78,6.62,7.59,18.65,22.53,31.07,39.50,48.15;...
    2.85,4.78,6.58,7.53,18.65,22.41,31.02,39.50,48.26;...
    2.85,4.78,6.65,7.60,18.65,22.60,31.12,39.61,48.33;...
    2.85,4.78,6.61,7.53,18.65,22.52,31.09,39.54,48.21;...
    2.85,4.78,6.67,7.64,18.65,22.84,31.26,39.49,48.30;...
    2.85,4.78,6.86,7.89,18.65,23.08,31.57,39.92,48.72;...
    2.85,4.78,6.92,7.89,18.65,23.05,31.37,39.68,48.84];
latency_sds_table = [.30,.30,.42,.43,.46,.66,.49,.45,1.32;...
    .30,.30,.26,.35,.46,.38,.37,.32,.42;...
    .30,.30,.21,.28,.46,.28,.45,.27,.31;...
    .30,.30,.25,.36,.46,.56,.44,.52,.48;...
    .30,.30,.23,.34,.46,.60,.46,.42,.29;...
    .30,.30,.27,.33,.46,.54,.54,.43,.45;...
    .30,.30,.23,.31,.46,.40,.44,.46,.34;...
    .30,.30,.26,.34,.46,.67,.71,.62,.73;...
    .30,.30,.33,.43,.46,.56,.50,.42,.46;...
    .30,.30,.19,.29,.46,.71,.30,.22,.65;...
    .30,.30,.32,.44,.46,.71,.70,.77,1.00;...
    .30,.30,.38,.46,.46,.61,.55,.46,.59];
% determine applicable row of above variables
if Bundle.age < 2;         age_row = 1;
elseif Bundle.age < 5;     age_row = 2;
elseif Bundle.age < 8;     age_row = 3;
elseif Bundle.age < 11;    age_row = 4;
elseif Bundle.age < 14;    age_row = 5;
elseif Bundle.age < 17;    age_row = 6;
elseif Bundle.age < 21;    age_row = 7;
elseif Bundle.age < 30;    age_row = 8;
elseif Bundle.age < 40;    age_row = 9;
elseif Bundle.age < 50;    age_row = 10;
elseif Bundle.age < 60;    age_row = 11;
else                       age_row = 12; %(i.e., older than 60)
end

% First plot da and reps invisibly to establish plot and axis limits
% The reason I am later (visibly) replotting rather than plotting them 
% visibly here, is that the ones plotted here are eclipsed by the
% rectangles because there is no mechanism for setting recs' transparency
daplot = plot(Bundle.xda,Bundle.dawave,'LineStyle','none');
hold on
for x = 1:size(Bundle.dareps,2)
    plot(Bundle.xda,Bundle.dareps{x}(:,3),'LineStyle','none');
end
maximize
xlim([Bundle.damin Bundle.damax])
[~,basefile] = fileparts(Bundle.filename);
title([basefile, ' da'], 'interpreter', 'none');

% Next, superimpose boxes signifying expected ranges given age of subject
yaxes = get(gca,'ylim'); % to eventually determine the size of the rectangle.
SDcriterion = 2; % this is the "plus or minus SD" value for boxes.
latency_means = latency_means_table(age_row,:); % means for this subject's age
latency_sds = latency_sds_table(age_row,:); % SDs for this subject's age

% Starting points and sizes of the boxes (for each peak)
boxstarts_x = latency_means-SDcriterion.*latency_sds;
boxstarts_y = repmat(yaxes(1),length(latency_means),1);
widths = 2.*SDcriterion.*latency_sds;
% heights = repmat(yaxes(2)-yaxes(1),1,length(latency_means));
% heightsPos = yaxes(2);
% heightsNeg = abs(yaxes(1));

% doing pks I,III,V first, because positive.
for m = 1:3
rectangle('Position',[boxstarts_x(m),0,widths(m),yaxes(2)], ...
    'FaceColor',[.9 .9 .9], 'LineStyle','none');
end

% now the rest, negative.
for m = 4:length(latency_means)
    rectangle('Position',[boxstarts_x(m),boxstarts_y(m),widths(m),abs(yaxes(1))], ...
        'FaceColor',[.9 .9 .9], 'LineStyle','none')
end

% Now replot "da" for real (have to replot so it's not obscured by the
% rectangles.)
plot(Bundle.xda,Bundle.dawave,'b','linewidth',2);

% Apply existing da markers
% create 'str' variable that defines what appears in datatips
for x= 1:size(Bundle.dalabels,1)
    str{x} = {[Bundle.dalabels{x} ': '], 'Amp: '};
end

nulloc = 1; % "Null" location. Where to place unmarked peak.
for p = 1:size(Bundle.dalabels,1)
    currentlat = Bundle.dalatencies.(Bundle.dalabels{p});
    [~,currentpoint] = closestrc(Bundle.xda,currentlat);
    if currentpoint ~= 1; % a 1 indicates NaN
        datatip(daplot, currentpoint, str{p}, 'hold');
    else
        datatip(daplot, nulloc, str{p}, 'hold'); % if NaN, stick label in prestim
        nulloc = nulloc + 12; % bump any subsequent NaN out a bit.
    end
end

% add replications
for x = 1:size(Bundle.dareps,2)
    plot(Bundle.xda,Bundle.dareps{x}(:,3),'color',[.7 .7 .7],'linewidth',.5);
end

% Add zero line
plot([0 0],yaxes,':k')
ylim(yaxes); %for good measure because sometimes it doesn't play nicely.

% Put plot in "ready to pick peaks" mode.
DataCursorObj = datacursormode(gcf);
set(DataCursorObj,'Enable','on')

% User now tweaks, adds, or deletes markers to the da waveform, and
% chooses to either "Finish" or "Abort."

% "Finish" button (calls 'finishup' subfunction)
uicontrol(gcf,'style','pushbutton',...
    'string','Finish',...
    'units','normalized',...
    'Position', [0.85 0.1 0.1 0.1],... % lower right
    'BackgroundColor', [.35 .4 .3],... % greenish
    'FontSize', 12,...
    'FontWeight', 'bold',...
    'ForegroundColor', [1 1 1],... % font color (white)
    'callback',@finishup); 

% "Abort" button (calls 'abort' subfunction)
uicontrol(gcf,'style','pushbutton',...
    'string','XX Abort XX',...
    'units','normalized',...
    'Position', [0.05 0.1 0.1 0.1],... % lower left
    'BackgroundColor', [.8 0 0],... % red
    'FontSize', 12,...
    'FontWeight', 'bold',...
    'ForegroundColor', [1 1 1],... % font color (white)
    'callback',@abort); 

end % of movetoda subfunction

%% On pushing 'Finish' button... 
function finishup(~,~)
% Grabs the da latencies and proceeds to assembly, time-stamping, and saving stage.

global NewLats Bundle 

% Gobble up the (new/changed) da latencies, put them in cell 2 of
% NewLats, and close the figure
DataCursorDa = datacursormode(gcf);
set(DataCursorDa,'Enable','on')
NewLats{2} = getCursorInfo(DataCursorDa);
close(gcf);

% Now, organize the latencies for packaging into original structure
for x = 1:size(NewLats{1},2)
    ClkLats(x,1) = NewLats{1}(x).Position(1);
end
for x = 1:size(NewLats{2},2)
    DaLats(x,1) = NewLats{2}(x).Position(1);
end
clear NewLats x DataCursorDa  

% Now determine whether any click peaks have been changed.
% Harvested latencies (i.e., contents of ClkLats) are arranged in reverse
% order to how they're placed on the figure, so we must recreate a 
% mirror-image of Bundle.clklabels.
clklabels = flipud(Bundle.clklabels);
% Now we create "before" and "after" arrays to determine whether any markers
% have changed
for x = 1:size(clklabels,1)
    before(x,1) = Bundle.clklatencies.(clklabels{x});
end
% "before" and "ClkLats" may have NaN's or negative numbers respectively, 
% so we must set them to something innocuous like -99 so they're aligned
before(isnan(before)) = -99;
ClkLats(ClkLats < 0) = -99;
% Check whether any peaks been changed beyond tolerence. If so, set
% clkchange = 1.
tol = .0001; % Just in case 64-bit precision adds twelve 0's and a 1.
if max(abs(before - ClkLats)) >= tol
    clkchange = 1; % signify that it has changed (merely by existing)
    ClkLats(ClkLats == -99) = NaN; % restore NaNs
end
clear before  x

% Same as above, but for 'da' and sans commenting.
dalabels = flipud(Bundle.dalabels);
for x = 1:size(dalabels,1)
    before(x,1) = Bundle.dalatencies.(dalabels{x});
end
before(isnan(before)) = -99;
DaLats(DaLats < 0) = -99;
if max(abs(before - DaLats)) >= tol
    dachange = 1;
    DaLats(DaLats == -99) = NaN;
end
clear before x tol
 
% If any latency has changed, update & timestamp appropriate variable(s) and save
if exist('clkchange','var') + exist('dachange','var') > 0
    % reload original mat-file
    load(Bundle.filename);
    if exist('clkchange','var') 
        for x = 1:size(clklabels,1)
            clk.chan(Bundle.chan).latencies.(clklabels{x}) = ClkLats(x);
        end
        clk.meta.revised = datestr(now);
    end
    if exist('dachange','var')
        for x = 1:size(dalabels,1)
            da.chan(Bundle.chan).latencies.(dalabels{x}) = DaLats(x);
        end
        da.meta.revised = datestr(now);
    end
    save(Bundle.filename,'clk','da','meta');
    clc, display('Mat-file updated.');
else
    clc, display('No changes noted; mat-file not updated.');
end

end % of finishup subfunction

%% On pushing 'Abort' button... 
function abort(~,~)
close all
clc
display('Aborted; mat-file not updated.');
end % of abort subfunction
